# Supplementary material for: KIM-1/TIM-1 is a Receptor for SARS-CoV-2 in Lung and Kidney
Source: bioRxiv or medRxiv preprint supplement (doi:10.1101/2020.09.16.20190694), 2022-01-11
Supplement: Supplementary file [file media-1.pdf]

KIM-1 SARS Nucleocapsid Protein DAPI

Non COVID-19 Lung Autopsy

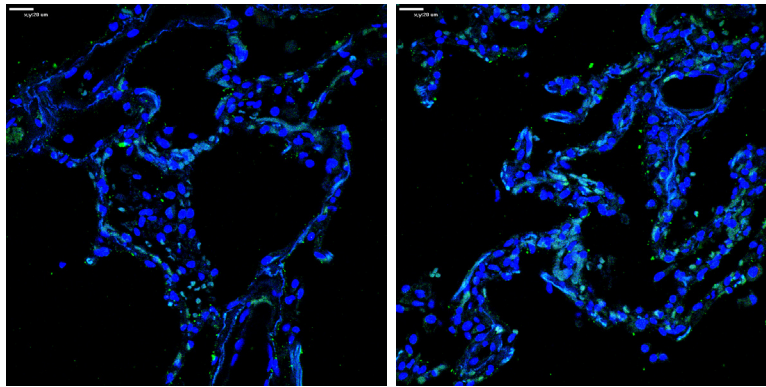

**Supplementary Figure 1. Non COVID-19 lungs expresses very low amount of KIM-1.** Immunostaining of KIM-1 and SARS Nucleocapsid Protein. Scale bars: 20 µm.

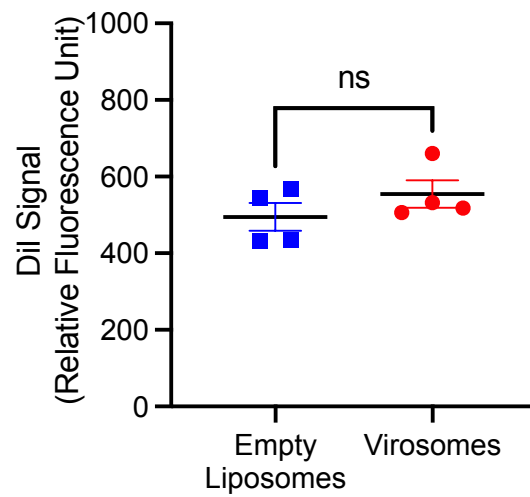

**Supplementary Figure 2. No significant difference was observed between Dil signal from labeled empty liposomes and labeled virosomes.** Dil signal was detected by using fluorescence plate reader.  $p=0.1427$ .

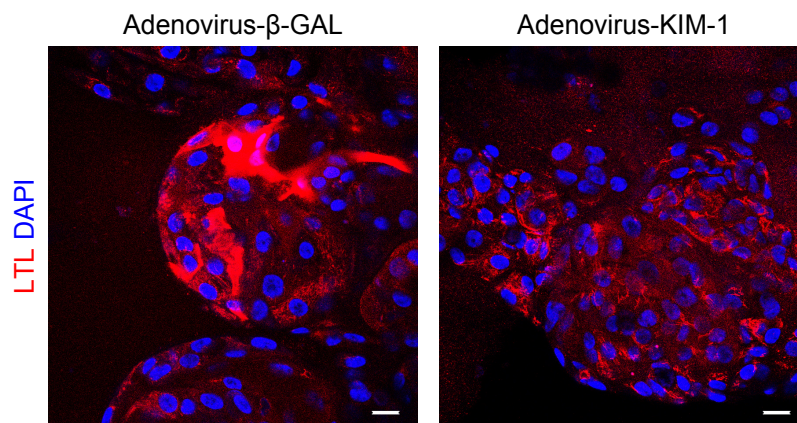

**Supplementary Figure 3. Adenovirus-KIM-1 infection decreases Lotus tetragonolobus lectin (LTL) expression when compared with Adenovirus-β-gal infection of tubuloids.**

**a**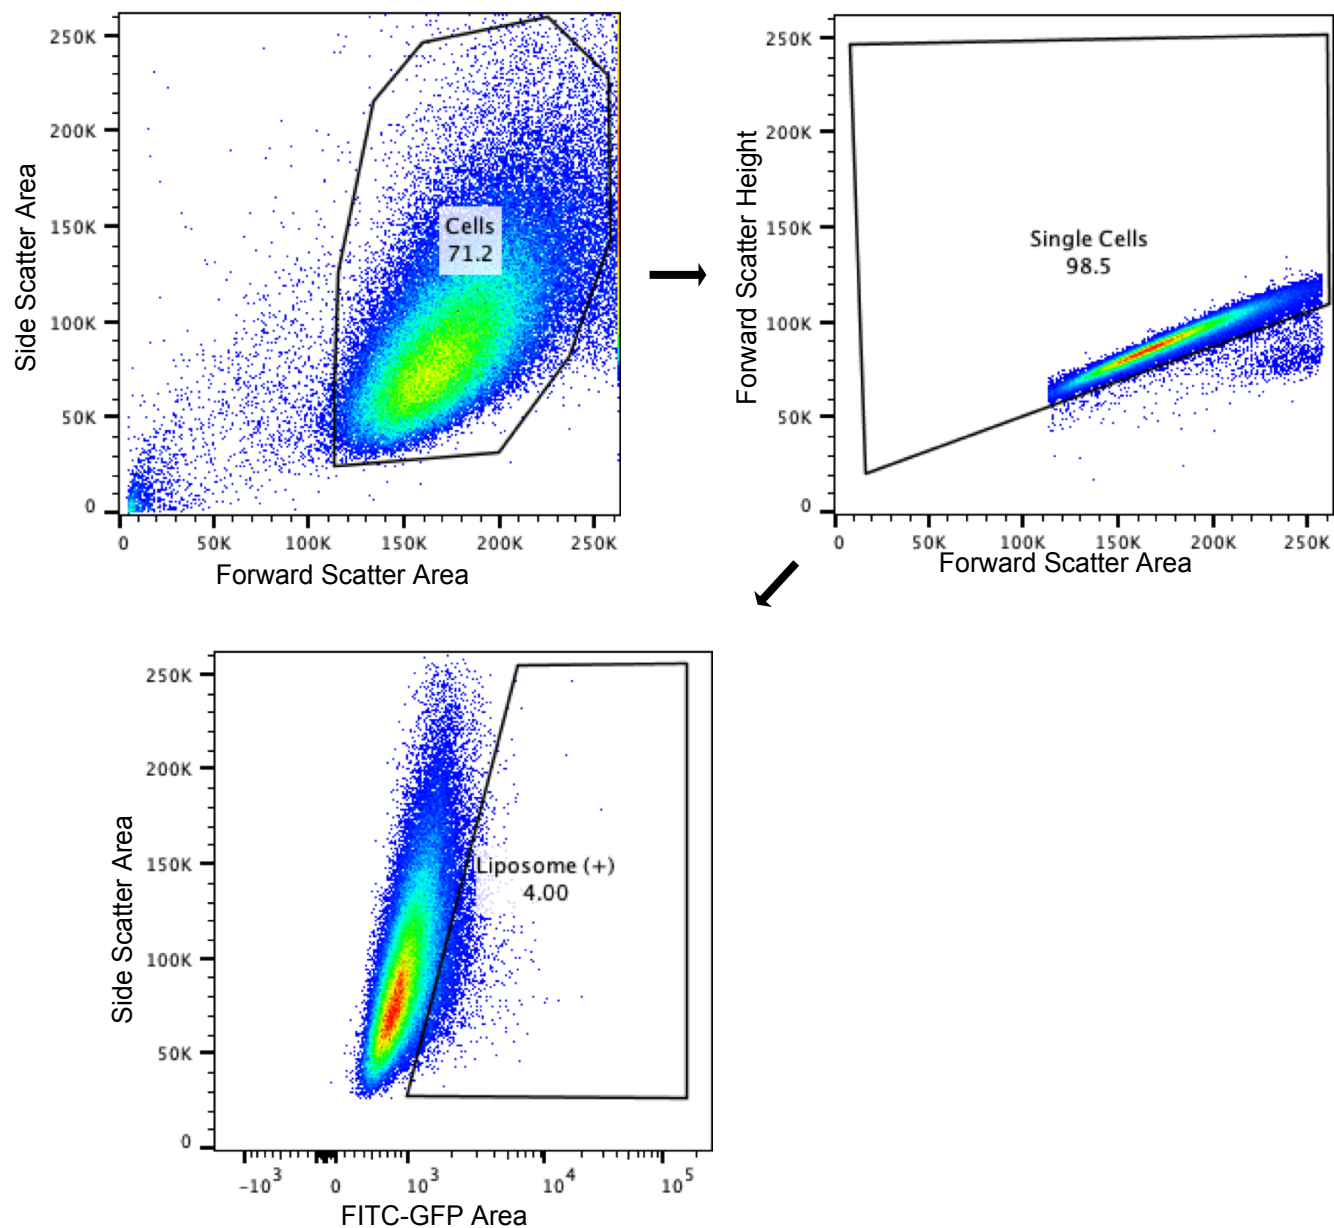**b**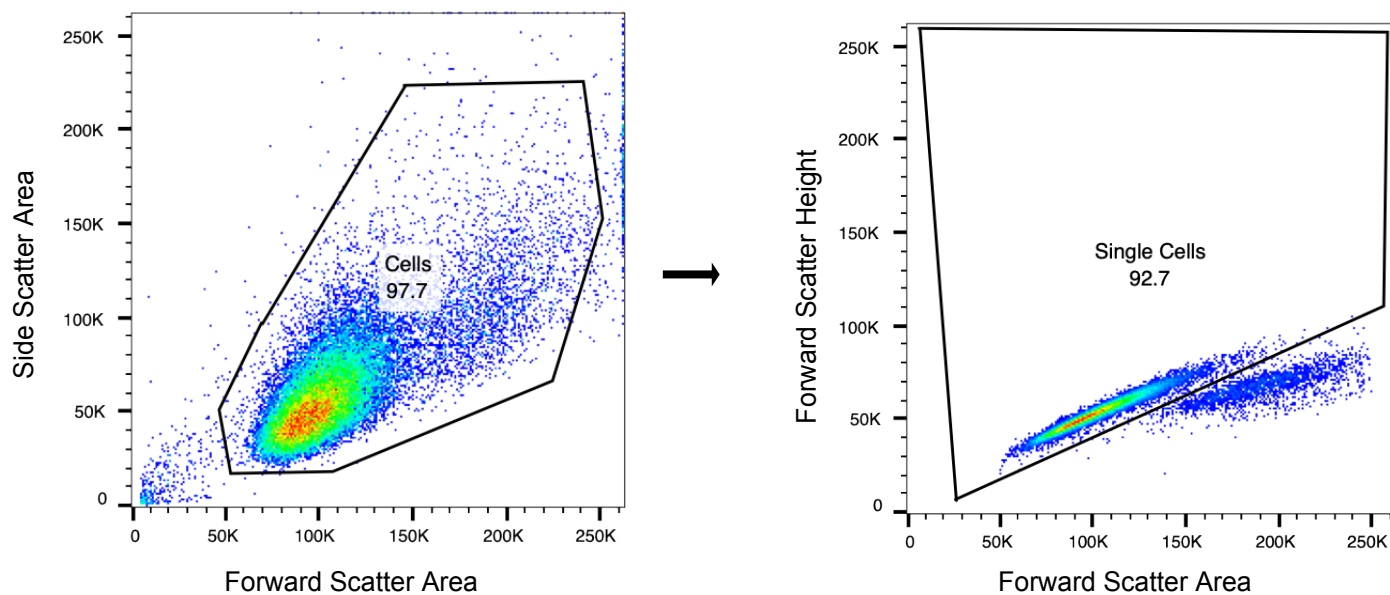

**Supplementary Figure 4. Gating Strategy for flow cytometry for cells.** (a) Gating strategy on the analysis of virosome (or control liposome)-treated A549 cells for **Fig. 2b**. (b) Gating strategy on the analysis of virosome-treated A549 cells for **Fig. 2e**.

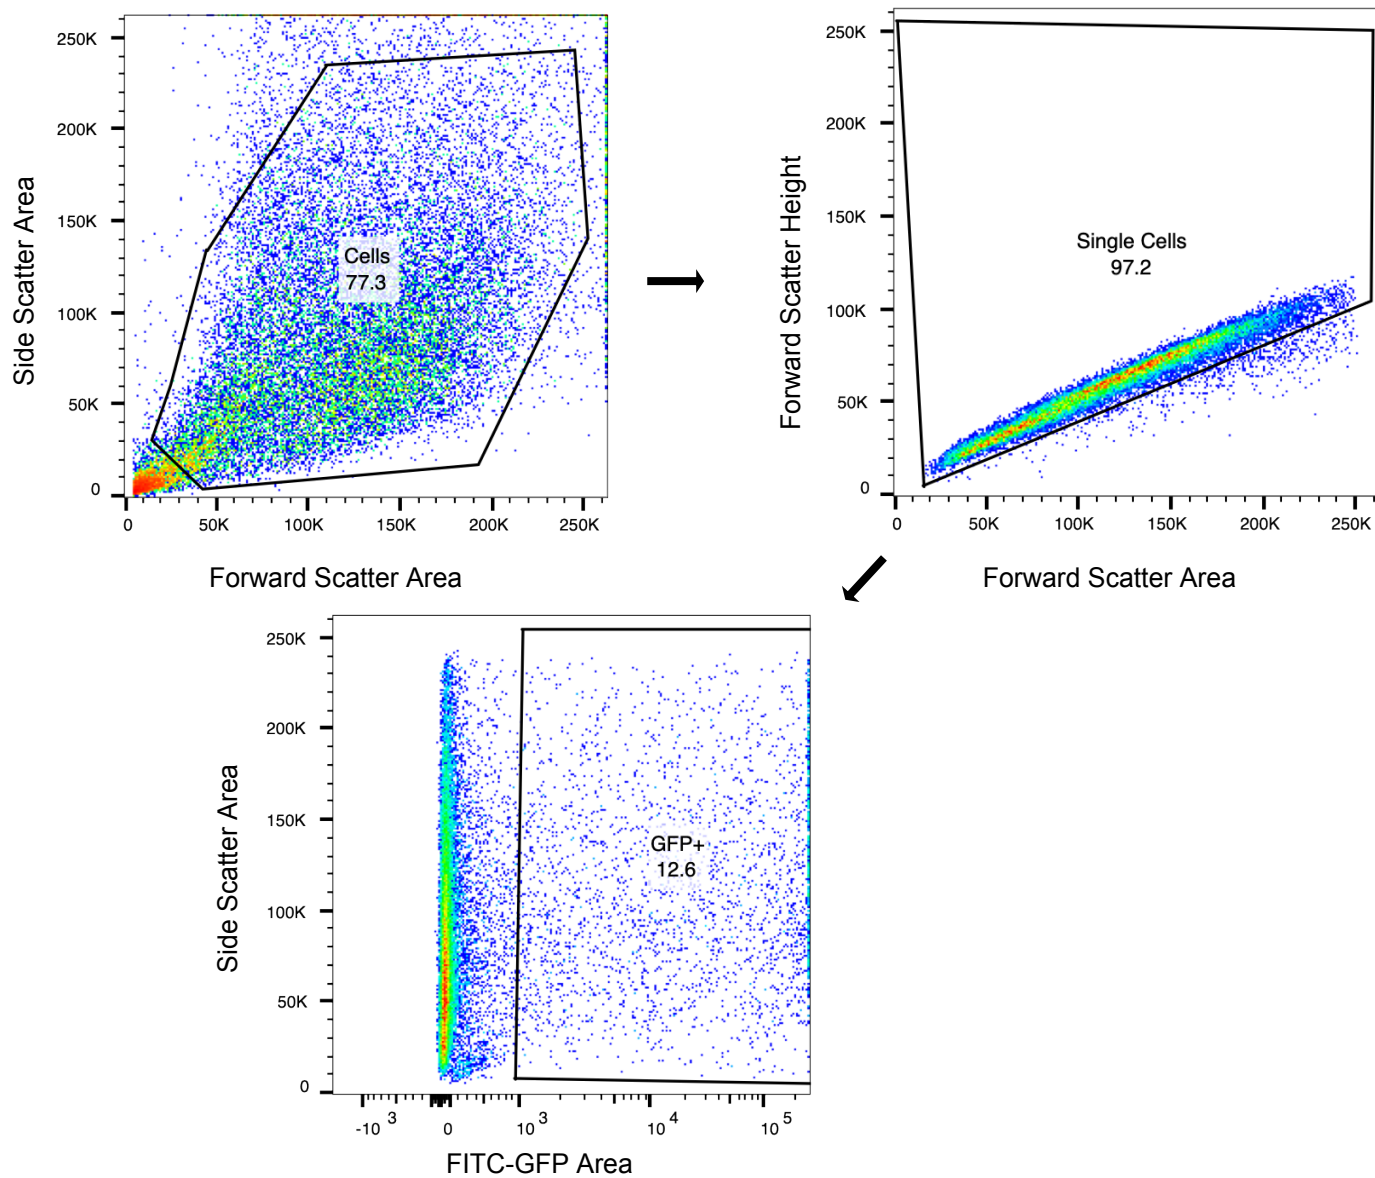

**Supplementary Figure 5. Gating Strategy for flow cytometry for tubuloids.** Gating strategy on the analysis of virosome-treated and digested human renal tubuloids (**Fig.4f**).

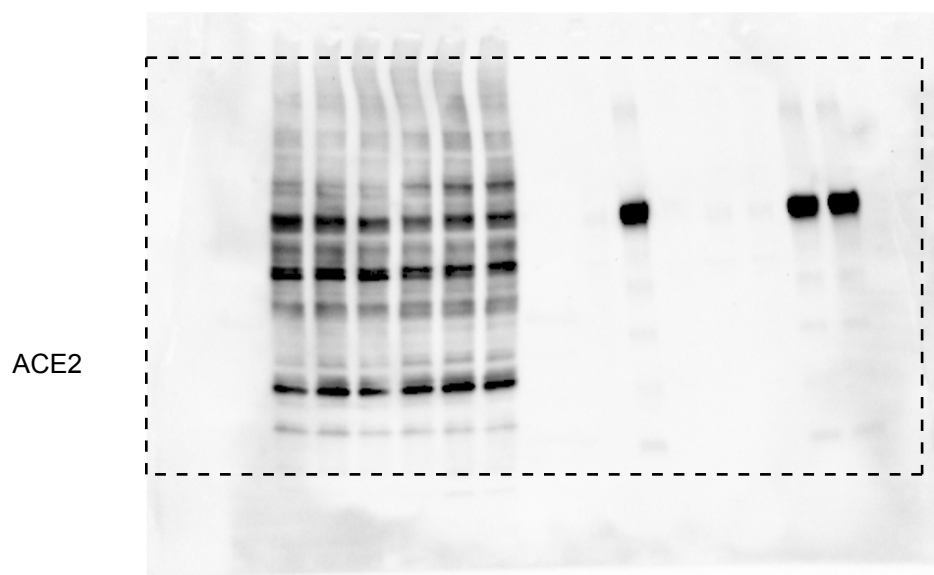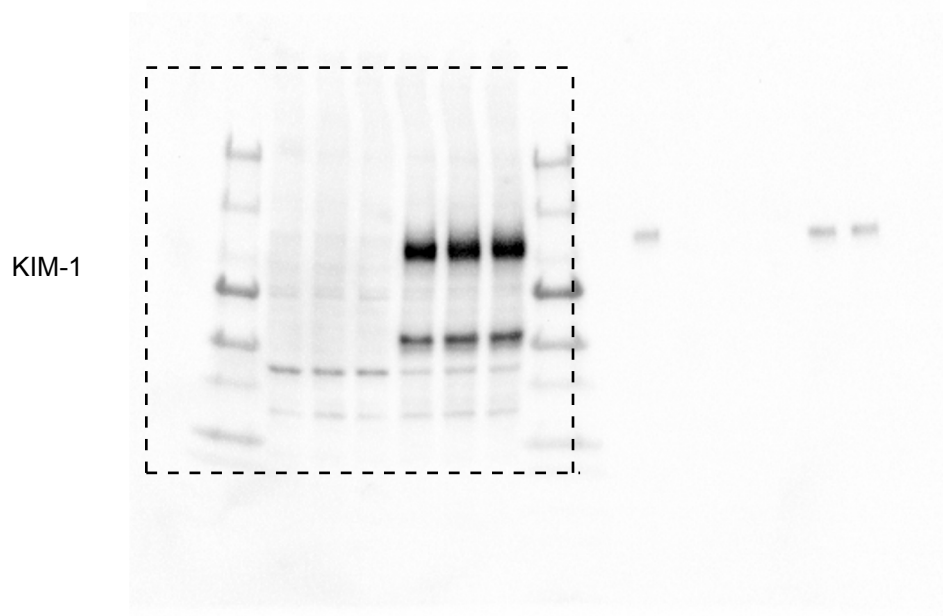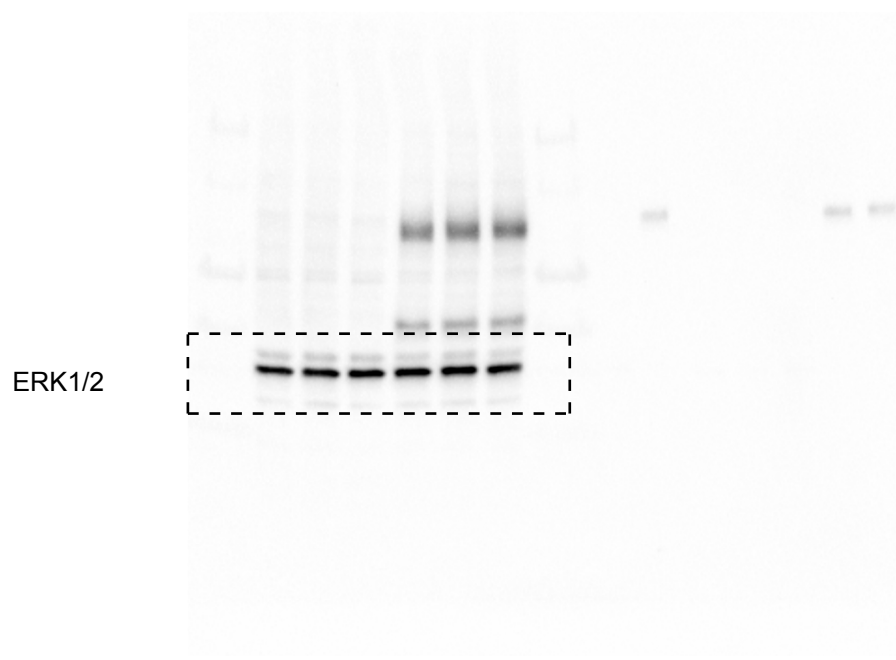

**Supplementary Figure 6. Whole membrane images of western blotting in Fig. 3c.**  
The areas surrounded by the dotted line are shown as **Fig. 3c**.

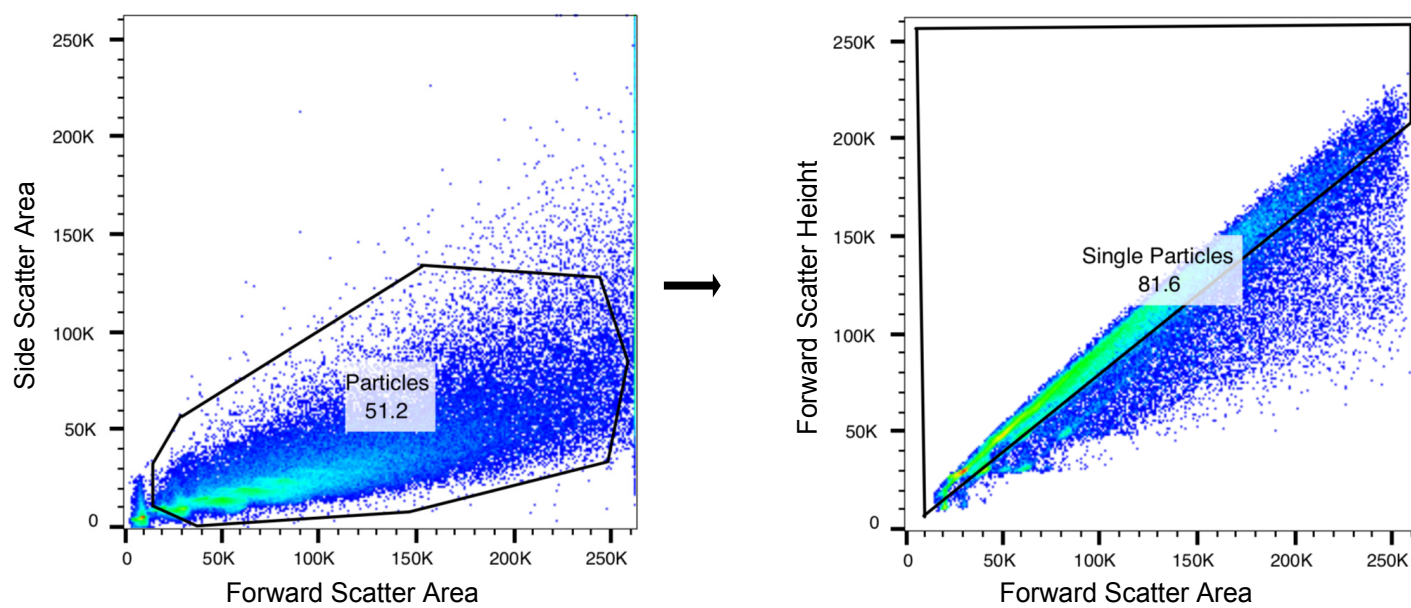

**Supplementary Figure 7. Gating Strategy for flow cytometry for fluorospheres.** Gating strategy on the analysis of *in vitro* binding assay (Fig. 5).
